# Supplementary material for: Replication and Active Demethylation Represent Partially Overlapping Mechanisms for Erasure of H3K4me3 in Budding Yeast
Source: PLOS journal article supplement (doi:10.1371/journal.pgen.1000837), 2010-02-04

Figure S6

A

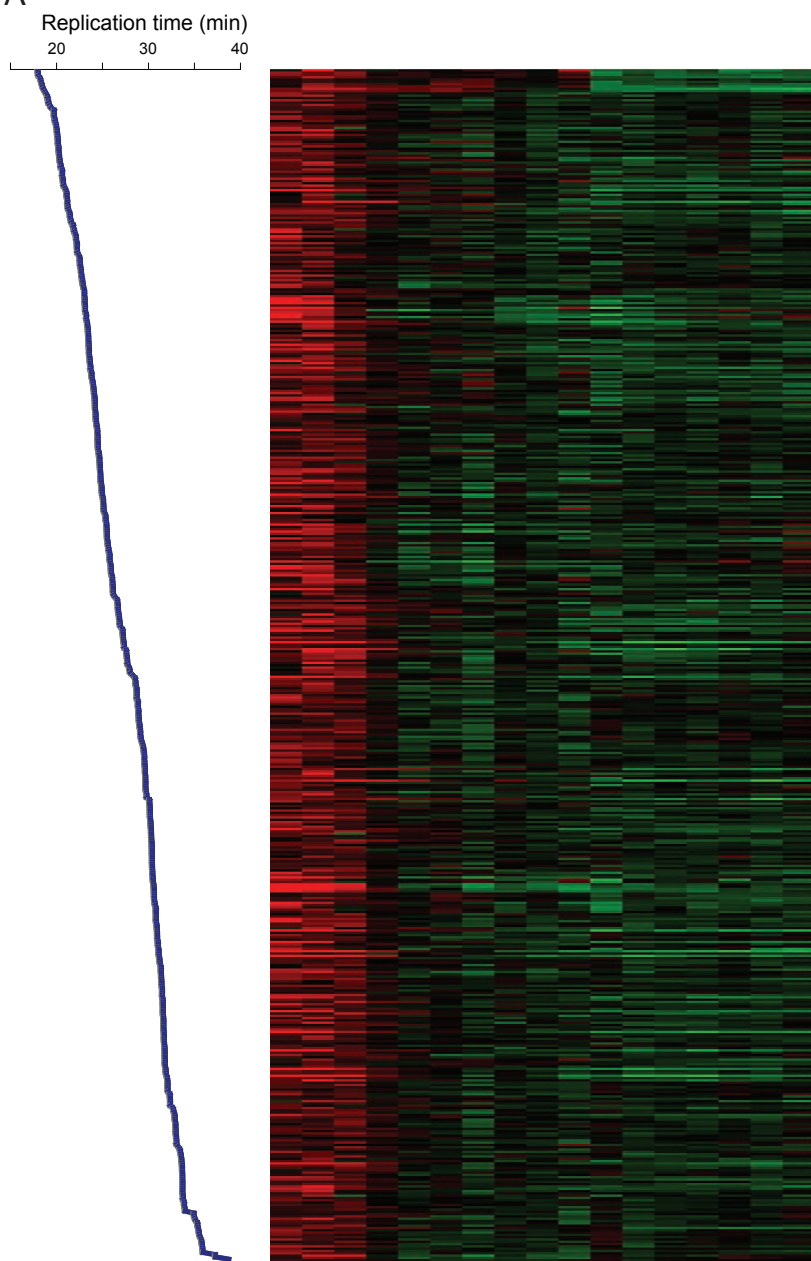

B

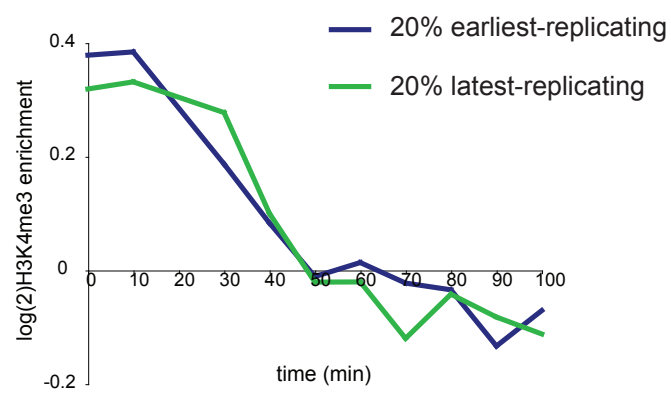

Supplement: S6 (10.1371/journal.pgen.1000837.s006) [file journal.pgen.1000837.s006]
